# Supplementary material for: Controlled and tuneable drug release from electrospun fibers and a non-invasive approach for cytotoxicity testing
Source: PubMed Central journal article supplement (PMC6401126; doi:10.1038/s41598-019-40079-7), 2019-03-05
Supplement: 41598_2019_40079_MOESM1_ESM.pdf [file 41598_2019_40079_MOESM1_ESM.pdf]

## Supplementary material

### Controlled and tuneable drug release from electrospun fibers and a non-invasive approach for cytotoxicity testing

G. Piccirillo<sup>a,b</sup>, D. A. Carvajal Berrio<sup>b</sup>, A. Laurita<sup>a</sup>, A. Pepe<sup>a</sup>, B. Bochicchio<sup>a</sup>, K. Schenke-Layland<sup>b,c,d</sup>, S. Hinderer<sup>b,c\*</sup>

<sup>a</sup>Dept. of Science, University of Basilicata, 85100 Potenza, Italy; <sup>b</sup>Dept. of Women's Health, Research Institute for Women's Health, Eberhard-Karls-University Tübingen, 72076 Tübingen, Germany; <sup>c</sup>Dept. of Biophysical Chemistry, Natural and Medical Sciences Institute (NMI) at the University of Tübingen, 72770 Reutlingen, Germany; <sup>d</sup>Dept. of Medicine/Cardiology, Cardiovascular Research Laboratories, David Geffen School of Medicine at UCLA, Los Angeles, CA, USA.

\* Corresponding author: Svenja Hinderer, NMI Reutlingen, Department of Biophysical Chemistry, Markwiesenstr. 55, 72770 Reutlingen, Germany; Fax: +49-7121-51530-16; Tel: +49-7121-51530-802; E-mail: [svenja.hinderer@nmi.de](mailto:svenja.hinderer@nmi.de)

$$I(t) = \alpha_1 e^{-t/\tau_1} + \alpha_2 e^{-t/\tau_2} + C$$

**Equation S1.** Two exponential decay fitting used for the FLIM analysis.  $\alpha_1$  represents the free NAD(P)H lifetime time while  $\alpha_2$  the protein bound NAD(P)H one.

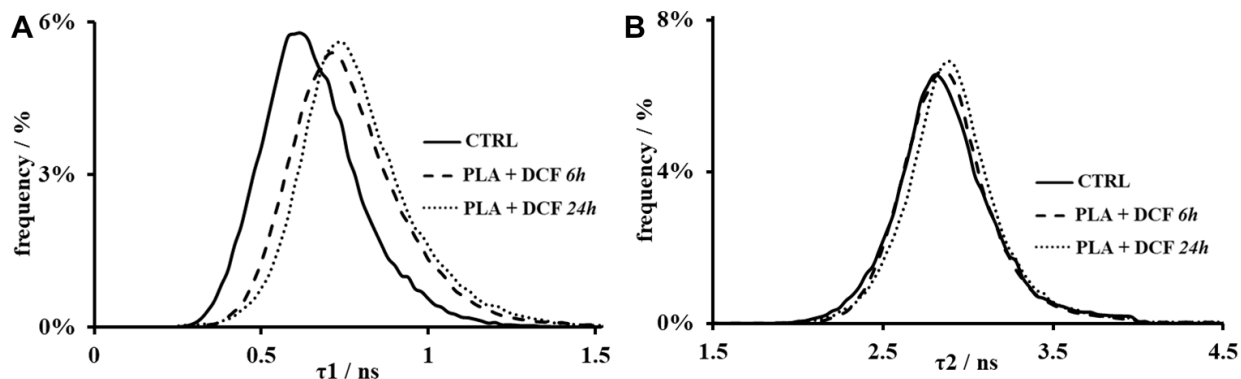

**Fig. S1.** Histograms for the distribution of  $\tau_1$  (A) and  $\tau_2$  (B) values

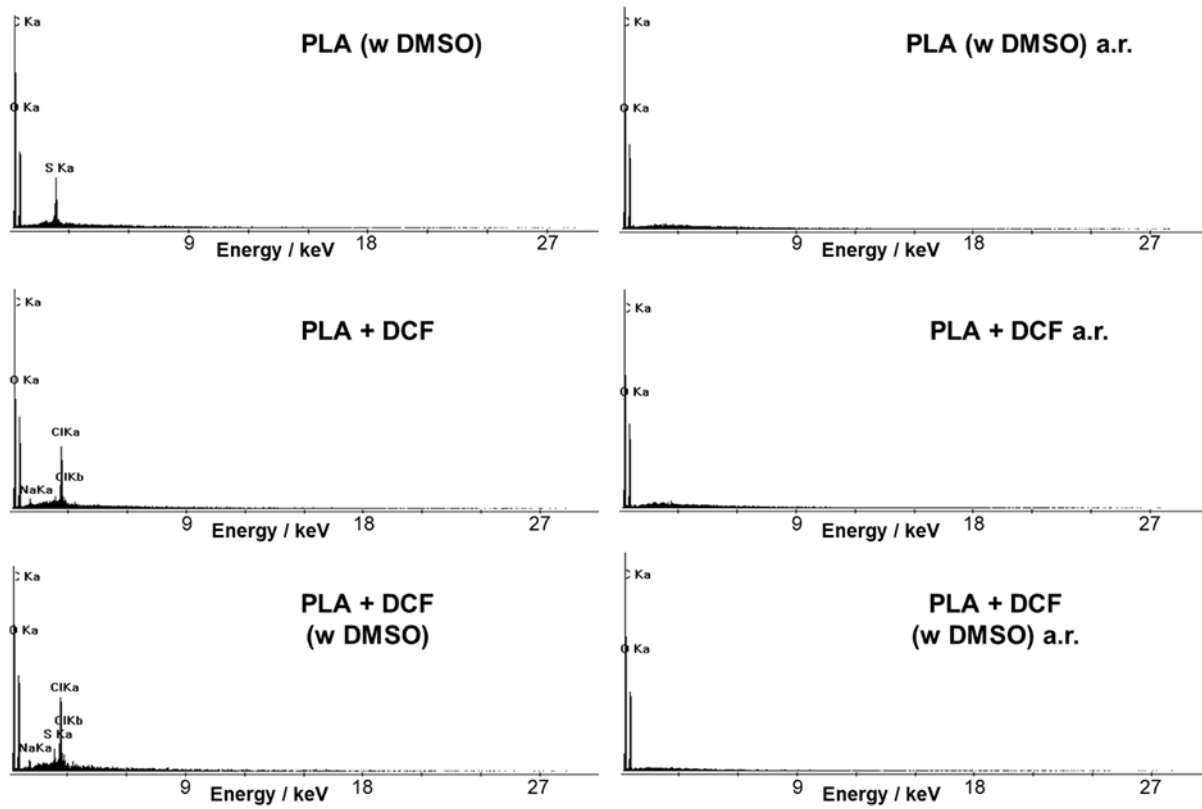

**Fig. S2.** Full EDS spectra of the electrospun scaffolds (a.r.=after release).

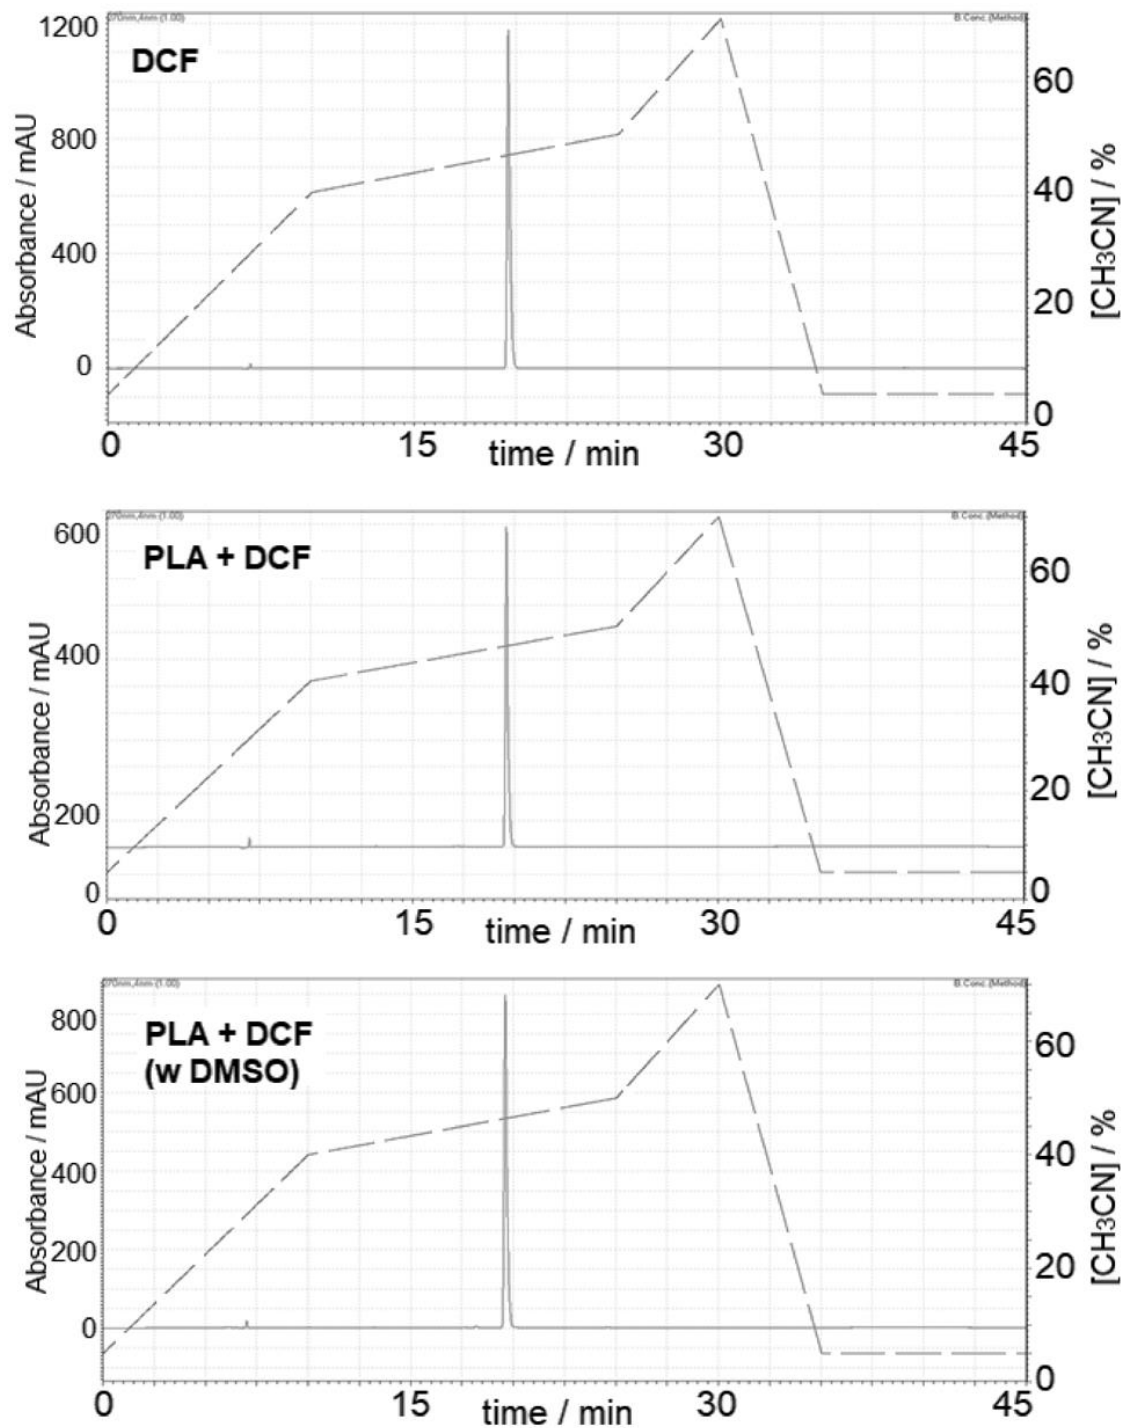

**Fig. S3.** RP-HPLC chromatograms. From above: DCF 1 mg/mL in PBS; DCF in PBS after its release from a PLA scaffold; DCF in PBS after its release from a DMSO-containing PLA scaffold. Dashed line represent acetonitrile gradient.

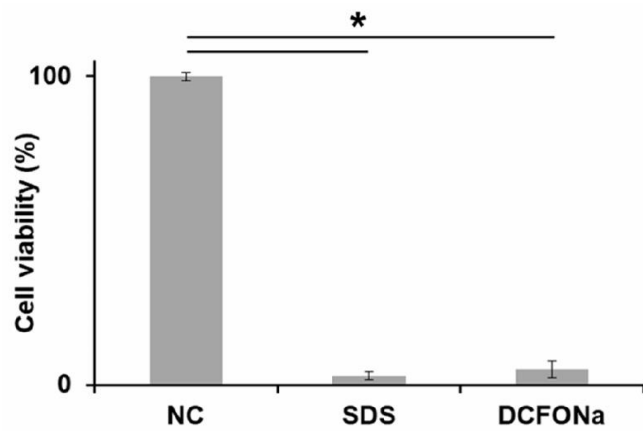

**Fig. S4.** MTS-assay. Cell viability after treatment with free DCFONa. \* $p < 0.05$
